# Supplementary material
Source: PubMed Central journal article supplement (PMC4246045)
Supplement: NIHMS631241-supplement-supplement_1.pdf [file NIHMS631241-supplement-supplement_1.pdf]

**Supplementary Table 1:** Comorbidity definition by Medical Evidence Report (CMS Form 2728) and ICD-9 diagnosis code.

| <b>Comorbidity</b>          | <b>Medical Evidence Report comorbid condition</b>                                                                        | <b>ICD-9 diagnosis code</b>                                                                                                                                                                                                                                      |
|-----------------------------|--------------------------------------------------------------------------------------------------------------------------|------------------------------------------------------------------------------------------------------------------------------------------------------------------------------------------------------------------------------------------------------------------|
| Arrhythmia                  | NA                                                                                                                       | 426.0X, 426.13, 426.7X, 426.9X, 426.10, 426.12, 427.0X-427.4X, 427.6X, 427.8X, 427.9X, 785.0X, 996.01, 996.04, V45.0, V53.3                                                                                                                                      |
| Cancer                      | Malignant neoplasm, cancer                                                                                               | 14X.XX-208.XX, excluding 173.XX                                                                                                                                                                                                                                  |
| Coronary artery disease     | Atherosclerotic heart disease                                                                                            | 410.XX-413.XX                                                                                                                                                                                                                                                    |
| Deep vein thrombosis        | NA                                                                                                                       | 451.1X, 451.2X, 451.8X, 451.9X, 453.0X, 453.1X, 453.2X, 453.4X, 453.8X, 453.9X                                                                                                                                                                                   |
| Diabetes mellitus           | Diabetes, currently on insulin<br>Diabetes, on oral medications<br>Diabetes, without medications<br>Diabetic retinopathy | 250.XX, 357.2X, 326.0X, 362.07                                                                                                                                                                                                                                   |
| Gastrointestinal bleeding   | NA                                                                                                                       | 456.0, 456.2, 530.21, 530.7, 530.82, 531.0X, 531.2X, 531.4X, 531.6X, 532.0X, 532.2X, 532.4X, 532.6X, 533.0X, 533.2X, 533.4X, 533.6X, 534.0X, 534.2X, 534.4X, 534.6X, 535.X1, 537.83, 537.84, 562.02, 562.03, 562.12, 562.13, 569.3, 569.85, 573.83, 578.X, 772.4 |
| Heart failure               | Congestive heart failure                                                                                                 | 398.91, 402.X1, 404.X1, 404.X3, 428.XX                                                                                                                                                                                                                           |
| Hemorrhagic stroke          | NA                                                                                                                       | 430.XX, 431.XX, 432.XX                                                                                                                                                                                                                                           |
| Ischemic stroke             | Cerebrovascular disease, cerebrovascular accident, transient ischemic attack                                             | 433.X1, 434.X1, 436.XX, 437.1X                                                                                                                                                                                                                                   |
| Liver disease               | NA                                                                                                                       | 070.22, 070.23, 070.32, 070.33, 070.44, 070.54, 070.6, 070.9X, 456.0X-456.2X, 570.XX, 571.XX, 572.2X-572.4X, 572.8X, 573.3X, 573.4X, 573.8X, 573.9X, V42.7                                                                                                       |
| Peripheral vascular disease | Peripheral vascular disease<br>Amputation                                                                                | 093.0X, 437.3X, 440.XX, 441.XX, 443.1X, 443.2X, 443.8X, 443.9X, 447.1X,                                                                                                                                                                                          |

|                    |                                          |                                                                           |
|--------------------|------------------------------------------|---------------------------------------------------------------------------|
| Pulmonary disease  | Chronic obstructive<br>pulmonary disease | 557.1X, 557.9X, V43.4, 84.3X<br>490.XX, 491.XX, 492.XX,<br>494.XX, 496.XX |
| Pulmonary embolism |                                          | 415.1X                                                                    |

---

**Supplementary Table 2.** Baseline characteristics of patients who resumed outpatient hemodialysis (HD) after a gastrointestinal bleeding event (GIB), categorized by whether they had a recurrent GIB.

| Variable                                                      | Did not have a recurrent GIB<br>(N = 1252) | Had a recurrent GIB<br>(N= 90) | P-value |
|---------------------------------------------------------------|--------------------------------------------|--------------------------------|---------|
| <b>Demographics</b>                                           |                                            |                                |         |
| Age (yr, mean $\pm$ SD)                                       | 77 $\pm$ 6                                 | 75 $\pm$ 6                     | 0.01    |
| Male sex, N (%)                                               | 622 (50)                                   | 42 (47)                        | 0.58    |
| Race, N (%)                                                   |                                            |                                | 0.96    |
| Black                                                         | 391 (31)                                   | 27 (30)                        |         |
| White                                                         | 773 (62)                                   | 57 (63)                        |         |
| Other <sup>1</sup>                                            | 88 (7)                                     | - (7)                          |         |
| Hispanic ethnicity <sup>1</sup>                               | 161 (13)                                   | - (10)                         | 0.43    |
| Years on dialysis (median & IQR)                              | 1.8 (0.7-3.5)                              | 2.0 (0.7-3.5)                  | 0.53    |
| <b>Reported comorbidities, N (%)</b>                          |                                            |                                |         |
| Arrhythmia                                                    | 262 (21)                                   | 16 (18)                        | 0.48    |
| Cancer                                                        | 159 (13)                                   | 10 (11)                        | 0.66    |
| Coronary artery disease                                       | 547 (44)                                   | 41 (46)                        | 0.73    |
| Deep vein thrombosis                                          | 121 (10)                                   | 10 (11)                        | 0.66    |
| Diabetes mellitus                                             | 720 (58)                                   | 53 (59)                        | 0.80    |
| Previous gastrointestinal bleeding                            | 148 (12)                                   | 14 (16)                        | 0.29    |
| Heart failure                                                 | 609 (49)                                   | 52 (58)                        | 0.09    |
| Hemorrhagic stroke <sup>1</sup>                               | - (1)                                      | - (1)                          | 0.68    |
| Ischemic stroke                                               | 258 (21)                                   | 19 (21)                        | 0.91    |
| Liver disease <sup>1</sup>                                    | 64 (5)                                     | - (4)                          | 0.78    |
| Peripheral vascular disease                                   | 393 (31)                                   | 31 (34)                        | 0.55    |
| Pulmonary disease                                             | 268 (21)                                   | 27 (30)                        | 0.06    |
| Pulmonary embolism <sup>1</sup>                               | 19 (2)                                     | - (<1)                         | 0.24    |
| <b>GIB characteristics</b>                                    |                                            |                                |         |
| Year GIB occurred                                             |                                            |                                | 0.69    |
| 2004                                                          | 190 (15)                                   | 13 (14)                        |         |
| 2005                                                          | 342 (27)                                   | 30 (33)                        |         |
| 2006                                                          | 242 (19)                                   | 18 (20)                        |         |
| 2007                                                          | 258 (21)                                   | 14 (16)                        |         |
| 2008                                                          | 220 (18)                                   | 15 (17)                        |         |
| Transfusions received during GIB hospitalization <sup>1</sup> |                                            |                                | 0.83    |
| 0                                                             | 770 (62)                                   | 56 (62)                        |         |
| 1                                                             | 470 (38)                                   | 34 (38)                        |         |
| 2                                                             | - (<1)                                     | - (<1)                         |         |
| 3                                                             | - (<1)                                     | - (<1)                         |         |

| Variable                                                                           | Did not have a recurrent GIB (N = 1252) | Had a recurrent GIB (N= 90) | P-value |
|------------------------------------------------------------------------------------|-----------------------------------------|-----------------------------|---------|
| Days from hospital admission for GIB to resumption of outpatient HD (median & IQR) | 7 (5-12)                                | 7 (4-10)                    | 0.04    |
| <b>Vital signs and laboratory measurements</b>                                     |                                         |                             |         |
| Weight (kg) by quartile                                                            |                                         |                             | 0.20    |
| <58                                                                                | 300 (24)                                | 15 (17)                     |         |
| 58-67.9                                                                            | 301 (24)                                | 19 (21)                     |         |
| 68-78.9                                                                            | 307 (25)                                | 22 (24)                     |         |
| ≥79                                                                                | 288 (23)                                | 28 (31)                     |         |
| Pre-dialysis systolic blood pressure (mmHg)                                        |                                         |                             | 0.09    |
| <120                                                                               | 292 (23)                                | 30 (33)                     |         |
| 120-139                                                                            | 315 (25)                                | 16 (18)                     |         |
| 140-159                                                                            | 311 (25)                                | 23 (26)                     |         |
| ≥160                                                                               | 307 (25)                                | 17 (19)                     |         |
| Hemoglobin (g/dL) <sup>1</sup>                                                     |                                         |                             | 0.08    |
| <9                                                                                 | 179 (14)                                | 20 (22)                     |         |
| 9-9.9                                                                              | 123 (10)                                | 12 (13)                     |         |
| 10-10.9                                                                            | 181 (14)                                | - (10)                      |         |
| 11-11.9                                                                            | 244 (19)                                | 21 (23)                     |         |
| 12-12.9                                                                            | 260 (21)                                | 12 (13)                     |         |
| 13-13.9                                                                            | 139 (11)                                | 12 (13)                     |         |
| ≥14                                                                                | 82 (7)                                  | - (2)                       |         |
| Platelets (x10 <sup>3</sup> /μL) <sup>1</sup>                                      |                                         |                             | 0<0.001 |
| <150                                                                               | 145 (12)                                | - (10)                      |         |
| 150-229                                                                            | 403 (32)                                | 44 (49)                     |         |
| 230-310                                                                            | 356 (28)                                | 13 (14)                     |         |
| 311-400                                                                            | 147 (12)                                | - (6)                       |         |
| >400                                                                               | 59 (5)                                  | - (10)                      |         |
| Albumin (g/dL) <sup>1</sup>                                                        |                                         |                             | 0.60    |
| <2.5                                                                               | 35 (3)                                  | - (1)                       |         |
| 2.5-2.9                                                                            | 116 (9)                                 | - (10)                      |         |
| 3-3.4                                                                              | 278 (22)                                | 22 (24)                     |         |
| 3.5-3.9                                                                            | 484 (39)                                | 31 (34)                     |         |
| ≥4                                                                                 | 212 (17)                                | 20 (22)                     |         |
| Kt/V <sup>1</sup>                                                                  |                                         |                             | 0.27    |
| 0.5-1.1                                                                            | 89 (7)                                  | - (4)                       |         |
| 1.2-1.5                                                                            | 462 (37)                                | 42 (47)                     |         |
| 1.6-1.9                                                                            | 421 (34)                                | 25 (28)                     |         |
| 2.0-3.0                                                                            | 108 (9)                                 | - (8)                       |         |
| <b>Dialysis characteristics</b>                                                    |                                         |                             |         |

| Variable                                                              | Did not have a recurrent GIB (N = 1252) | Had a recurrent GIB (N= 90) | P-value |
|-----------------------------------------------------------------------|-----------------------------------------|-----------------------------|---------|
| Vascular access                                                       |                                         |                             | 0.74    |
| Central venous catheter                                               | 549 (44)                                | 41 (46)                     |         |
| Fistula or graft                                                      | 677 (54)                                | 47 (52)                     |         |
| Length of session (minutes) <sup>1</sup>                              |                                         |                             | 0.44    |
| <180                                                                  | 59 (5)                                  | - (1)                       |         |
| 180-194                                                               | 310 (25)                                | 17 (19)                     |         |
| 195-209                                                               | 100 (8)                                 | - (9)                       |         |
| 210-224                                                               | 390 (31)                                | 33 (37)                     |         |
| 225-239                                                               | 97 (8)                                  | - (9)                       |         |
| ≥240                                                                  | 296 (24)                                | 23 (26)                     |         |
| Reuse of dialysis filter (any)                                        | 713 (57)                                | 55 (61)                     | 0.44    |
| <b>Facility characteristics</b>                                       |                                         |                             |         |
| Number of outpatient hemodialysis patients (by quartile) <sup>2</sup> |                                         |                             | 0.26    |
| <53                                                                   | 301 (24)                                | 25 (28)                     |         |
| 53-78                                                                 | 320 (26)                                | 21 (23)                     |         |
| 79-113                                                                | 304 (24)                                | 28 (31)                     |         |
| ≥114                                                                  | 315 (25)                                | 16 (18)                     |         |
| Rural <sup>3</sup> , N (%)                                            | 205 (16)                                | 22 (24)                     | 0.05    |
| Census division <sup>4</sup> , N (%)                                  |                                         |                             | 0.57    |
| East North Central                                                    | 193 (15)                                | 19 (21)                     |         |
| East South Central                                                    | 63 (5)                                  | - (3)                       |         |
| Middle Atlantic                                                       | 116 (9)                                 | - (7)                       |         |
| Mountain                                                              | 54 (4)                                  | - (6)                       |         |
| New England                                                           | 50 (4)                                  | - (6)                       |         |
| Pacific                                                               | 208 (17)                                | 12 (13)                     |         |
| South Atlantic                                                        | 347 (28)                                | 29 (32)                     |         |
| West North Central                                                    | 75 (6)                                  | - (6)                       |         |
| West South Central                                                    | 146 (12)                                | - (7)                       |         |

SD=Standard deviation. IQR=interquartile range.

<sup>1</sup> Per federal research regulations, any cell counts less than 10 must not be reported.

<sup>2</sup> Reflects the number of outpatient hemodialysis patients treated at a facility at the end of year the GIB occurred, per the ESRD Facility Survey (form CMS-2744).

<sup>3</sup> Facilities were considered urban if they were classified as a metropolitan area in the Rural-Urban Commuting Area (RUCA) Codes version 2.0, which are based on 2000 Census commuting data and 2004 zip codes; all other areas were considered to be rural.<sup>11</sup>

<sup>4</sup> Facilities were categorized into one of nine U.S. Census Bureau Divisions based on their state.<sup>12</sup>

Note: Variables and the N (%) patients who did not have a recurrent bleed vs. N (%) patients who received did have a recurrent bleed with missing data:

Weight<sup>1</sup>: 56 (4) vs. - (7)

Pre-dialysis systolic blood pressure<sup>1</sup>: 27 (2) vs. - (4)

Hemoglobin<sup>1</sup>: 44 (4) vs. 1 (2)

Platelet count: 142 (11) vs. 10 (11)

Albumin: 127 (10) vs. - (8)

Kt/V: 172 (14) vs. 12 (13)

Vascular access<sup>1</sup>: 26 (2) vs.- (2)

Facility number of outpatient hemodialysis patients<sup>1</sup>: 12 (1) vs.- (<1)

Facility rural status<sup>1</sup>: - (<1) vs.- (<1)
